# Supplementary material for: Revealing Selection in Breeding and Genetic Characteristics of Economically Important Traits of New Species of Apostichopus Japonicas Based on Genome Resequencing and GWAS Analysis
Source: Frontiers journal article supplement (doi:10.3389/fmars.2022.948882), 2022-07-12
Supplement: Data_Sheet_2.xlsx [file Data_Sheet_2.xlsx]

## Sheet: Sheet1
MRZV01000001.1	AJAPscaffold1
MRZV01000010.1	AJAPscaffold10
MRZV01000100.1	AJAPscaffold100
MRZV01000996.1	AJAPscaffold1000
MRZV01000997.1	AJAPscaffold1001
MRZV01000998.1	AJAPscaffold1002
MRZV01000999.1	AJAPscaffold1003
MRZV01001000.1	AJAPscaffold1004
MRZV01001001.1	AJAPscaffold1005
MRZV01001002.1	AJAPscaffold1006
MRZV01001003.1	AJAPscaffold1007
MRZV01001004.1	AJAPscaffold1008
MRZV01001005.1	AJAPscaffold1009
MRZV01000101.1	AJAPscaffold101
MRZV01001006.1	AJAPscaffold1010
MRZV01001007.1	AJAPscaffold1011
MRZV01001008.1	AJAPscaffold1012
MRZV01001009.1	AJAPscaffold1013
MRZV01001010.1	AJAPscaffold1014
MRZV01001011.1	AJAPscaffold1015
MRZV01001012.1	AJAPscaffold1016
MRZV01001013.1	AJAPscaffold1017
MRZV01001014.1	AJAPscaffold1018
MRZV01001015.1	AJAPscaffold1019
MRZV01000102.1	AJAPscaffold102
MRZV01001016.1	AJAPscaffold1020
MRZV01001017.1	AJAPscaffold1021
MRZV01001018.1	AJAPscaffold1022
MRZV01001019.1	AJAPscaffold1023
MRZV01001020.1	AJAPscaffold1024
MRZV01001021.1	AJAPscaffold1025
MRZV01001022.1	AJAPscaffold1026
MRZV01001023.1	AJAPscaffold1027
MRZV01001024.1	AJAPscaffold1028
MRZV01001025.1	AJAPscaffold1029
MRZV01000103.1	AJAPscaffold103
MRZV01001026.1	AJAPscaffold1030
MRZV01001027.1	AJAPscaffold1031
MRZV01001028.1	AJAPscaffold1032
MRZV01001029.1	AJAPscaffold1033
MRZV01001030.1	AJAPscaffold1034
MRZV01001031.1	AJAPscaffold1035
MRZV01001032.1	AJAPscaffold1036
MRZV01001033.1	AJAPscaffold1037
MRZV01001034.1	AJAPscaffold1038
MRZV01001035.1	AJAPscaffold1039
MRZV01000104.1	AJAPscaffold104
MRZV01001036.1	AJAPscaffold1040
MRZV01001037.1	AJAPscaffold1041
MRZV01001038.1	AJAPscaffold1042
MRZV01001039.1	AJAPscaffold1043
MRZV01001040.1	AJAPscaffold1044
MRZV01001041.1	AJAPscaffold1045
MRZV01001042.1	AJAPscaffold1046
MRZV01001043.1	AJAPscaffold1047
MRZV01001044.1	AJAPscaffold1048
MRZV01001045.1	AJAPscaffold1049
MRZV01000105.1	AJAPscaffold105
MRZV01001046.1	AJAPscaffold1050
MRZV01001047.1	AJAPscaffold1051
MRZV01001048.1	AJAPscaffold1052
MRZV01001049.1	AJAPscaffold1053
MRZV01001050.1	AJAPscaffold1054
MRZV01001051.1	AJAPscaffold1055
MRZV01001052.1	AJAPscaffold1056
MRZV01001053.1	AJAPscaffold1057
MRZV01001054.1	AJAPscaffold1058
MRZV01001055.1	AJAPscaffold1059
MRZV01000106.1	AJAPscaffold106
MRZV01001056.1	AJAPscaffold1060
MRZV01001057.1	AJAPscaffold1061
MRZV01001058.1	AJAPscaffold1062
MRZV01001059.1	AJAPscaffold1063
MRZV01001060.1	AJAPscaffold1064
MRZV01001061.1	AJAPscaffold1065
MRZV01001062.1	AJAPscaffold1066
MRZV01001063.1	AJAPscaffold1067
MRZV01001064.1	AJAPscaffold1068
MRZV01001065.1	AJAPscaffold1069
MRZV01000107.1	AJAPscaffold107
MRZV01001066.1	AJAPscaffold1070
MRZV01001067.1	AJAPscaffold1071
MRZV01001068.1	AJAPscaffold1072
MRZV01001069.1	AJAPscaffold1073
MRZV01001070.1	AJAPscaffold1074
MRZV01001071.1	AJAPscaffold1075
MRZV01001072.1	AJAPscaffold1076
MRZV01001073.1	AJAPscaffold1077
MRZV01001074.1	AJAPscaffold1078
MRZV01001075.1	AJAPscaffold1079
MRZV01000108.1	AJAPscaffold108
MRZV01001076.1	AJAPscaffold1080
MRZV01001077.1	AJAPscaffold1081
MRZV01001078.1	AJAPscaffold1082
MRZV01001079.1	AJAPscaffold1083
MRZV01001080.1	AJAPscaffold1084
MRZV01001081.1	AJAPscaffold1085
MRZV01001082.1	AJAPscaffold1086
MRZV01001083.1	AJAPscaffold1087
MRZV01001084.1	AJAPscaffold1088
MRZV01001085.1	AJAPscaffold1089
MRZV01000109.1	AJAPscaffold109
MRZV01001086.1	AJAPscaffold1090
MRZV01001087.1	AJAPscaffold1091
MRZV01001088.1	AJAPscaffold1092
MRZV01001089.1	AJAPscaffold1093
MRZV01001090.1	AJAPscaffold1094
MRZV01001091.1	AJAPscaffold1095
MRZV01001092.1	AJAPscaffold1096
MRZV01001093.1	AJAPscaffold1097
MRZV01001094.1	AJAPscaffold1098
MRZV01001095.1	AJAPscaffold1099
MRZV01000011.1	AJAPscaffold11
MRZV01000110.1	AJAPscaffold110
MRZV01001096.1	AJAPscaffold1100
MRZV01001097.1	AJAPscaffold1101
MRZV01001098.1	AJAPscaffold1102
MRZV01001099.1	AJAPscaffold1103
MRZV01001100.1	AJAPscaffold1105
MRZV01001101.1	AJAPscaffold1106
MRZV01001102.1	AJAPscaffold1107
MRZV01001103.1	AJAPscaffold1108
MRZV01001104.1	AJAPscaffold1109
MRZV01000111.1	AJAPscaffold111
MRZV01001105.1	AJAPscaffold1110
MRZV01001106.1	AJAPscaffold1111
MRZV01001107.1	AJAPscaffold1112
MRZV01001108.1	AJAPscaffold1113
MRZV01001109.1	AJAPscaffold1114
MRZV01001110.1	AJAPscaffold1115
MRZV01001111.1	AJAPscaffold1116
MRZV01001112.1	AJAPscaffold1117
MRZV01001113.1	AJAPscaffold1118
MRZV01001114.1	AJAPscaffold1119
MRZV01000112.1	AJAPscaffold112
MRZV01001115.1	AJAPscaffold1120
MRZV01001116.1	AJAPscaffold1121
MRZV01001117.1	AJAPscaffold1122
MRZV01001118.1	AJAPscaffold1123
MRZV01001119.1	AJAPscaffold1124
MRZV01001120.1	AJAPscaffold1125
MRZV01001121.1	AJAPscaffold1126
MRZV01001122.1	AJAPscaffold1127
MRZV01001123.1	AJAPscaffold1128
MRZV01001124.1	AJAPscaffold1129
MRZV01000113.1	AJAPscaffold113
MRZV01001125.1	AJAPscaffold1130
MRZV01001126.1	AJAPscaffold1131
MRZV01001127.1	AJAPscaffold1132
MRZV01001128.1	AJAPscaffold1133
MRZV01001129.1	AJAPscaffold1134
MRZV01001130.1	AJAPscaffold1135
MRZV01001131.1	AJAPscaffold1136
MRZV01001132.1	AJAPscaffold1138
MRZV01001133.1	AJAPscaffold1139
MRZV01000114.1	AJAPscaffold114
MRZV01001134.1	AJAPscaffold1140
MRZV01001135.1	AJAPscaffold1141
MRZV01001136.1	AJAPscaffold1142
MRZV01001137.1	AJAPscaffold1144
MRZV01001138.1	AJAPscaffold1145
MRZV01001139.1	AJAPscaffold1146
MRZV01001140.1	AJAPscaffold1147
MRZV01001141.1	AJAPscaffold1148
MRZV01001142.1	AJAPscaffold1149
MRZV01000115.1	AJAPscaffold115
MRZV01001143.1	AJAPscaffold1151
MRZV01001144.1	AJAPscaffold1152
MRZV01001145.1	AJAPscaffold1153
MRZV01001146.1	AJAPscaffold1154
MRZV01001147.1	AJAPscaffold1155
MRZV01001148.1	AJAPscaffold1156
MRZV01001149.1	AJAPscaffold1157
MRZV01001150.1	AJAPscaffold1158
MRZV01001151.1	AJAPscaffold1159
MRZV01000116.1	AJAPscaffold116
MRZV01001152.1	AJAPscaffold1160
MRZV01001153.1	AJAPscaffold1161
MRZV01001154.1	AJAPscaffold1162
MRZV01001155.1	AJAPscaffold1163
MRZV01001156.1	AJAPscaffold1164
MRZV01001157.1	AJAPscaffold1165
MRZV01001158.1	AJAPscaffold1166
MRZV01001159.1	AJAPscaffold1167
MRZV01001160.1	AJAPscaffold1168
MRZV01001161.1	AJAPscaffold1169
MRZV01000117.1	AJAPscaffold117
MRZV01001162.1	AJAPscaffold1170
MRZV01001163.1	AJAPscaffold1171
MRZV01001164.1	AJAPscaffold1172
MRZV01001165.1	AJAPscaffold1173
MRZV01001166.1	AJAPscaffold1174
MRZV01001167.1	AJAPscaffold1175
MRZV01001168.1	AJAPscaffold1176
MRZV01001169.1	AJAPscaffold1177
MRZV01001170.1	AJAPscaffold1178
MRZV01001171.1	AJAPscaffold1179
MRZV01000118.1	AJAPscaffold118
MRZV01001172.1	AJAPscaffold1180
MRZV01001173.1	AJAPscaffold1181
MRZV01001174.1	AJAPscaffold1182
MRZV01001175.1	AJAPscaffold1183
MRZV01001176.1	AJAPscaffold1184
MRZV01001177.1	AJAPscaffold1185
MRZV01001178.1	AJAPscaffold1186
MRZV01001179.1	AJAPscaffold1187
MRZV01001180.1	AJAPscaffold1188
MRZV01001181.1	AJAPscaffold1189
MRZV01000119.1	AJAPscaffold119
MRZV01001182.1	AJAPscaffold1190
MRZV01001183.1	AJAPscaffold1191
MRZV01001184.1	AJAPscaffold1192
MRZV01001185.1	AJAPscaffold1193
MRZV01001186.1	AJAPscaffold1194
MRZV01001187.1	AJAPscaffold1195
MRZV01001188.1	AJAPscaffold1196
MRZV01001189.1	AJAPscaffold1197
MRZV01001190.1	AJAPscaffold1198
MRZV01001191.1	AJAPscaffold1199
MRZV01000012.1	AJAPscaffold12
MRZV01000120.1	AJAPscaffold120
MRZV01001192.1	AJAPscaffold1200
MRZV01001193.1	AJAPscaffold1201
MRZV01001194.1	AJAPscaffold1202
MRZV01001195.1	AJAPscaffold1203
MRZV01001196.1	AJAPscaffold1204
MRZV01001197.1	AJAPscaffold1205
MRZV01001198.1	AJAPscaffold1206
MRZV01001199.1	AJAPscaffold1207
MRZV01001200.1	AJAPscaffold1208
MRZV01001201.1	AJAPscaffold1209
MRZV01000121.1	AJAPscaffold121
MRZV01001202.1	AJAPscaffold1210
MRZV01001203.1	AJAPscaffold1211
MRZV01001204.1	AJAPscaffold1212
MRZV01001205.1	AJAPscaffold1213
MRZV01001206.1	AJAPscaffold1214
MRZV01001207.1	AJAPscaffold1215
MRZV01001208.1	AJAPscaffold1216
MRZV01001209.1	AJAPscaffold1217
MRZV01001210.1	AJAPscaffold1218
MRZV01001211.1	AJAPscaffold1219
MRZV01000122.1	AJAPscaffold122
MRZV01001212.1	AJAPscaffold1220
MRZV01001213.1	AJAPscaffold1221
MRZV01001214.1	AJAPscaffold1222
MRZV01001215.1	AJAPscaffold1223
MRZV01001216.1	AJAPscaffold1224
MRZV01001217.1	AJAPscaffold1225
MRZV01001218.1	AJAPscaffold1226
MRZV01001219.1	AJAPscaffold1227
MRZV01001220.1	AJAPscaffold1228
MRZV01001221.1	AJAPscaffold1229
MRZV01000123.1	AJAPscaffold123
MRZV01001222.1	AJAPscaffold1230
MRZV01001223.1	AJAPscaffold1231
MRZV01001224.1	AJAPscaffold1232
MRZV01001225.1	AJAPscaffold1233
MRZV01001226.1	AJAPscaffold1234
MRZV01001227.1	AJAPscaffold1235
MRZV01001228.1	AJAPscaffold1236
MRZV01001229.1	AJAPscaffold1237
MRZV01001230.1	AJAPscaffold1238
MRZV01001231.1	AJAPscaffold1239
MRZV01000124.1	AJAPscaffold124
MRZV01001232.1	AJAPscaffold1240
MRZV01001233.1	AJAPscaffold1241
MRZV01001234.1	AJAPscaffold1242
MRZV01001235.1	AJAPscaffold1243
MRZV01001236.1	AJAPscaffold1244
MRZV01001237.1	AJAPscaffold1246
MRZV01001238.1	AJAPscaffold1247
MRZV01001239.1	AJAPscaffold1248
MRZV01001240.1	AJAPscaffold1249
MRZV01000125.1	AJAPscaffold125
MRZV01001241.1	AJAPscaffold1250
MRZV01001242.1	AJAPscaffold1251
MRZV01001243.1	AJAPscaffold1252
MRZV01001244.1	AJAPscaffold1253
MRZV01001245.1	AJAPscaffold1254
MRZV01001246.1	AJAPscaffold1256
MRZV01001247.1	AJAPscaffold1258
MRZV01001248.1	AJAPscaffold1259
MRZV01000126.1	AJAPscaffold126
MRZV01001249.1	AJAPscaffold1260
MRZV01001250.1	AJAPscaffold1261
MRZV01001251.1	AJAPscaffold1262
MRZV01001252.1	AJAPscaffold1263
MRZV01001253.1	AJAPscaffold1264
MRZV01001254.1	AJAPscaffold1265
MRZV01001255.1	AJAPscaffold1266
MRZV01001256.1	AJAPscaffold1267
MRZV01001257.1	AJAPscaffold1268
MRZV01001258.1	AJAPscaffold1269
MRZV01000127.1	AJAPscaffold127
MRZV01001259.1	AJAPscaffold1270
MRZV01001260.1	AJAPscaffold1271
MRZV01001261.1	AJAPscaffold1272
MRZV01001262.1	AJAPscaffold1273
MRZV01001263.1	AJAPscaffold1274
MRZV01001264.1	AJAPscaffold1275
MRZV01001265.1	AJAPscaffold1276
MRZV01001266.1	AJAPscaffold1277
MRZV01001267.1	AJAPscaffold1278
MRZV01001268.1	AJAPscaffold1279
MRZV01000128.1	AJAPscaffold128
MRZV01001269.1	AJAPscaffold1280
MRZV01001270.1	AJAPscaffold1281
MRZV01001271.1	AJAPscaffold1282
MRZV01001272.1	AJAPscaffold1283
MRZV01001273.1	AJAPscaffold1284
MRZV01001274.1	AJAPscaffold1285
MRZV01001275.1	AJAPscaffold1286
MRZV01001276.1	AJAPscaffold1287
MRZV01001277.1	AJAPscaffold1288
MRZV01001278.1	AJAPscaffold1289
MRZV01000129.1	AJAPscaffold129
MRZV01001279.1	AJAPscaffold1290
MRZV01001280.1	AJAPscaffold1291
MRZV01001281.1	AJAPscaffold1292
MRZV01001282.1	AJAPscaffold1293
MRZV01001283.1	AJAPscaffold1294
MRZV01001284.1	AJAPscaffold1295
MRZV01001285.1	AJAPscaffold1296
MRZV01001286.1	AJAPscaffold1297
MRZV01001287.1	AJAPscaffold1298
MRZV01001288.1	AJAPscaffold1299
MRZV01000013.1	AJAPscaffold13
MRZV01000130.1	AJAPscaffold130
MRZV01001289.1	AJAPscaffold1300
MRZV01001290.1	AJAPscaffold1301
MRZV01001291.1	AJAPscaffold1302
MRZV01001292.1	AJAPscaffold1303
MRZV01001293.1	AJAPscaffold1304
MRZV01001294.1	AJAPscaffold1305
MRZV01001295.1	AJAPscaffold1306
MRZV01001296.1	AJAPscaffold1307
MRZV01001297.1	AJAPscaffold1308
MRZV01001298.1	AJAPscaffold1309
MRZV01000131.1	AJAPscaffold131
MRZV01001299.1	AJAPscaffold1310
MRZV01001300.1	AJAPscaffold1311
MRZV01001301.1	AJAPscaffold1312
MRZV01001302.1	AJAPscaffold1313
MRZV01001303.1	AJAPscaffold1314
MRZV01001304.1	AJAPscaffold1315
MRZV01001305.1	AJAPscaffold1316
MRZV01001306.1	AJAPscaffold1317
MRZV01001307.1	AJAPscaffold1318
MRZV01001308.1	AJAPscaffold1319
MRZV01000132.1	AJAPscaffold132
MRZV01001309.1	AJAPscaffold1320
MRZV01001310.1	AJAPscaffold1321
MRZV01001311.1	AJAPscaffold1322
MRZV01001312.1	AJAPscaffold1323
MRZV01001313.1	AJAPscaffold1324
MRZV01001314.1	AJAPscaffold1325
MRZV01001315.1	AJAPscaffold1326
MRZV01001316.1	AJAPscaffold1327
MRZV01001317.1	AJAPscaffold1328
MRZV01001318.1	AJAPscaffold1329
MRZV01000133.1	AJAPscaffold133
MRZV01001319.1	AJAPscaffold1330
MRZV01001320.1	AJAPscaffold1331
MRZV01001321.1	AJAPscaffold1332
MRZV01001322.1	AJAPscaffold1334
MRZV01001323.1	AJAPscaffold1335
MRZV01001324.1	AJAPscaffold1336
MRZV01001325.1	AJAPscaffold1337
MRZV01001326.1	AJAPscaffold1338
MRZV01001327.1	AJAPscaffold1339
MRZV01000134.1	AJAPscaffold134
MRZV01001328.1	AJAPscaffold1340
MRZV01001329.1	AJAPscaffold1341
MRZV01001330.1	AJAPscaffold1342
MRZV01001331.1	AJAPscaffold1343
MRZV01001332.1	AJAPscaffold1344
MRZV01001333.1	AJAPscaffold1345
MRZV01001334.1	AJAPscaffold1346
MRZV01001335.1	AJAPscaffold1347
MRZV01001336.1	AJAPscaffold1348
MRZV01001337.1	AJAPscaffold1349
MRZV01000135.1	AJAPscaffold135
MRZV01001338.1	AJAPscaffold1350
MRZV01001339.1	AJAPscaffold1351
MRZV01001340.1	AJAPscaffold1352
MRZV01001341.1	AJAPscaffold1353
MRZV01001342.1	AJAPscaffold1354
MRZV01001343.1	AJAPscaffold1355
MRZV01001344.1	AJAPscaffold1356
MRZV01001345.1	AJAPscaffold1357
MRZV01001346.1	AJAPscaffold1358
MRZV01001347.1	AJAPscaffold1359
MRZV01000136.1	AJAPscaffold136
MRZV01001348.1	AJAPscaffold1360
MRZV01001349.1	AJAPscaffold1361
MRZV01001350.1	AJAPscaffold1362
MRZV01001351.1	AJAPscaffold1363
MRZV01001352.1	AJAPscaffold1364
MRZV01001353.1	AJAPscaffold1365
MRZV01001354.1	AJAPscaffold1366
MRZV01001355.1	AJAPscaffold1368
MRZV01001356.1	AJAPscaffold1369
MRZV01000137.1	AJAPscaffold137
MRZV01001357.1	AJAPscaffold1370
MRZV01001358.1	AJAPscaffold1371
MRZV01001359.1	AJAPscaffold1372
MRZV01001360.1	AJAPscaffold1373
MRZV01001361.1	AJAPscaffold1374
MRZV01001362.1	AJAPscaffold1375
MRZV01001363.1	AJAPscaffold1376
MRZV01001364.1	AJAPscaffold1377
MRZV01001365.1	AJAPscaffold1378
MRZV01001366.1	AJAPscaffold1379
MRZV01000138.1	AJAPscaffold138
MRZV01001367.1	AJAPscaffold1380
MRZV01001368.1	AJAPscaffold1381
MRZV01001369.1	AJAPscaffold1382
MRZV01001370.1	AJAPscaffold1383
MRZV01001371.1	AJAPscaffold1384
MRZV01001372.1	AJAPscaffold1385
MRZV01001373.1	AJAPscaffold1386
MRZV01001374.1	AJAPscaffold1387
MRZV01001375.1	AJAPscaffold1388
MRZV01001376.1	AJAPscaffold1389
MRZV01000139.1	AJAPscaffold139
MRZV01001377.1	AJAPscaffold1390
MRZV01001378.1	AJAPscaffold1391
MRZV01001379.1	AJAPscaffold1392
MRZV01001380.1	AJAPscaffold1393
MRZV01001381.1	AJAPscaffold1395
MRZV01001382.1	AJAPscaffold1396
MRZV01001383.1	AJAPscaffold1397
MRZV01001384.1	AJAPscaffold1398
MRZV01001385.1	AJAPscaffold1399
MRZV01000014.1	AJAPscaffold14
MRZV01000140.1	AJAPscaffold140
MRZV01001386.1	AJAPscaffold1400
MRZV01001387.1	AJAPscaffold1401
MRZV01001388.1	AJAPscaffold1402
MRZV01001389.1	AJAPscaffold1403
MRZV01001390.1	AJAPscaffold1404
MRZV01001391.1	AJAPscaffold1405
MRZV01001392.1	AJAPscaffold1406
MRZV01001393.1	AJAPscaffold1407
MRZV01001394.1	AJAPscaffold1409
MRZV01000141.1	AJAPscaffold141
MRZV01001395.1	AJAPscaffold1410
MRZV01001396.1	AJAPscaffold1411
MRZV01001397.1	AJAPscaffold1412
MRZV01001398.1	AJAPscaffold1413
MRZV01001399.1	AJAPscaffold1414
MRZV01001400.1	AJAPscaffold1415
MRZV01001401.1	AJAPscaffold1416
MRZV01001402.1	AJAPscaffold1417
MRZV01001403.1	AJAPscaffold1418
MRZV01001404.1	AJAPscaffold1419
MRZV01000142.1	AJAPscaffold142
MRZV01001405.1	AJAPscaffold1420
MRZV01001406.1	AJAPscaffold1421
MRZV01001407.1	AJAPscaffold1424
MRZV01001408.1	AJAPscaffold1425
MRZV01001409.1	AJAPscaffold1426
MRZV01001410.1	AJAPscaffold1427
MRZV01001411.1	AJAPscaffold1428
MRZV01001412.1	AJAPscaffold1429
MRZV01000143.1	AJAPscaffold143
MRZV01001413.1	AJAPscaffold1432
MRZV01001414.1	AJAPscaffold1433
MRZV01001415.1	AJAPscaffold1434
MRZV01001416.1	AJAPscaffold1435
MRZV01001417.1	AJAPscaffold1436
MRZV01001418.1	AJAPscaffold1437
MRZV01001419.1	AJAPscaffold1438
MRZV01001420.1	AJAPscaffold1439
MRZV01000144.1	AJAPscaffold144
MRZV01001421.1	AJAPscaffold1440
MRZV01001422.1	AJAPscaffold1441
MRZV01001423.1	AJAPscaffold1442
MRZV01001424.1	AJAPscaffold1443
MRZV01001425.1	AJAPscaffold1444
MRZV01001426.1	AJAPscaffold1445
MRZV01001427.1	AJAPscaffold1446
MRZV01001428.1	AJAPscaffold1447
MRZV01001429.1	AJAPscaffold1449
MRZV01000145.1	AJAPscaffold145
MRZV01001430.1	AJAPscaffold1450
MRZV01001431.1	AJAPscaffold1451
MRZV01001432.1	AJAPscaffold1452
MRZV01001433.1	AJAPscaffold1453
MRZV01001434.1	AJAPscaffold1454
MRZV01001435.1	AJAPscaffold1455
MRZV01001436.1	AJAPscaffold1456
MRZV01001437.1	AJAPscaffold1457
MRZV01001438.1	AJAPscaffold1458
MRZV01001439.1	AJAPscaffold1459
MRZV01000146.1	AJAPscaffold146
MRZV01001440.1	AJAPscaffold1460
MRZV01001441.1	AJAPscaffold1461
MRZV01001442.1	AJAPscaffold1462
MRZV01001443.1	AJAPscaffold1463
MRZV01001444.1	AJAPscaffold1464
MRZV01001445.1	AJAPscaffold1465
MRZV01001446.1	AJAPscaffold1466
MRZV01001447.1	AJAPscaffold1467
MRZV01001448.1	AJAPscaffold1468
MRZV01001449.1	AJAPscaffold1469
MRZV01000147.1	AJAPscaffold147
MRZV01001450.1	AJAPscaffold1470
MRZV01001451.1	AJAPscaffold1471
MRZV01001452.1	AJAPscaffold1472
MRZV01001453.1	AJAPscaffold1473
MRZV01001454.1	AJAPscaffold1474
MRZV01001455.1	AJAPscaffold1475
MRZV01001456.1	AJAPscaffold1476
MRZV01001457.1	AJAPscaffold1477
MRZV01001458.1	AJAPscaffold1478
MRZV01001459.1	AJAPscaffold1479
MRZV01000148.1	AJAPscaffold148
MRZV01001460.1	AJAPscaffold1480
MRZV01001461.1	AJAPscaffold1481
MRZV01001462.1	AJAPscaffold1482
MRZV01001463.1	AJAPscaffold1483
MRZV01001464.1	AJAPscaffold1484
MRZV01001465.1	AJAPscaffold1485
MRZV01001466.1	AJAPscaffold1486
MRZV01001467.1	AJAPscaffold1487
MRZV01001468.1	AJAPscaffold1488
MRZV01001469.1	AJAPscaffold1489
MRZV01000149.1	AJAPscaffold149
MRZV01001470.1	AJAPscaffold1490
MRZV01001471.1	AJAPscaffold1491
MRZV01001472.1	AJAPscaffold1492
MRZV01001473.1	AJAPscaffold1493
MRZV01001474.1	AJAPscaffold1494
MRZV01001475.1	AJAPscaffold1495
MRZV01001476.1	AJAPscaffold1496
MRZV01001477.1	AJAPscaffold1497
MRZV01001478.1	AJAPscaffold1498
MRZV01001479.1	AJAPscaffold1499
MRZV01000015.1	AJAPscaffold15
MRZV01000150.1	AJAPscaffold150
MRZV01001480.1	AJAPscaffold1500
MRZV01001481.1	AJAPscaffold1501
MRZV01001482.1	AJAPscaffold1502
MRZV01001483.1	AJAPscaffold1503
MRZV01001484.1	AJAPscaffold1504
MRZV01001485.1	AJAPscaffold1505
MRZV01001486.1	AJAPscaffold1506
MRZV01001487.1	AJAPscaffold1507
MRZV01001488.1	AJAPscaffold1508
MRZV01000151.1	AJAPscaffold151
MRZV01001489.1	AJAPscaffold1510
MRZV01001490.1	AJAPscaffold1512
MRZV01001491.1	AJAPscaffold1513
MRZV01001492.1	AJAPscaffold1514
MRZV01001493.1	AJAPscaffold1515
MRZV01001494.1	AJAPscaffold1516
MRZV01001495.1	AJAPscaffold1517
MRZV01001496.1	AJAPscaffold1518
MRZV01001497.1	AJAPscaffold1519
MRZV01000152.1	AJAPscaffold152
MRZV01001498.1	AJAPscaffold1520
MRZV01001499.1	AJAPscaffold1521
MRZV01001500.1	AJAPscaffold1522
MRZV01001501.1	AJAPscaffold1523
MRZV01001502.1	AJAPscaffold1524
MRZV01001503.1	AJAPscaffold1525
MRZV01001504.1	AJAPscaffold1526
MRZV01001505.1	AJAPscaffold1527
MRZV01001506.1	AJAPscaffold1528
MRZV01001507.1	AJAPscaffold1529
MRZV01000153.1	AJAPscaffold153
MRZV01001508.1	AJAPscaffold1530
MRZV01001509.1	AJAPscaffold1531
MRZV01001510.1	AJAPscaffold1532
MRZV01001511.1	AJAPscaffold1533
MRZV01001512.1	AJAPscaffold1534
MRZV01001513.1	AJAPscaffold1535
MRZV01001514.1	AJAPscaffold1536
MRZV01001515.1	AJAPscaffold1537
MRZV01000154.1	AJAPscaffold154
MRZV01001516.1	AJAPscaffold1540
MRZV01001517.1	AJAPscaffold1541
MRZV01001518.1	AJAPscaffold1542
MRZV01001519.1	AJAPscaffold1543
MRZV01001520.1	AJAPscaffold1544
MRZV01001521.1	AJAPscaffold1545
MRZV01001522.1	AJAPscaffold1546
MRZV01001523.1	AJAPscaffold1547
MRZV01001524.1	AJAPscaffold1548
MRZV01001525.1	AJAPscaffold1549
MRZV01000155.1	AJAPscaffold155
MRZV01001526.1	AJAPscaffold1550
MRZV01001527.1	AJAPscaffold1551
MRZV01001528.1	AJAPscaffold1552
MRZV01001529.1	AJAPscaffold1553
MRZV01001530.1	AJAPscaffold1554
MRZV01001531.1	AJAPscaffold1555
MRZV01001532.1	AJAPscaffold1556
MRZV01001533.1	AJAPscaffold1557
MRZV01001534.1	AJAPscaffold1558
MRZV01001535.1	AJAPscaffold1559
MRZV01000156.1	AJAPscaffold156
MRZV01001536.1	AJAPscaffold1560
MRZV01001537.1	AJAPscaffold1561
MRZV01001538.1	AJAPscaffold1562
MRZV01001539.1	AJAPscaffold1564
MRZV01001540.1	AJAPscaffold1565
MRZV01001541.1	AJAPscaffold1566
MRZV01001542.1	AJAPscaffold1567
MRZV01001543.1	AJAPscaffold1568
MRZV01001544.1	AJAPscaffold1569
MRZV01000157.1	AJAPscaffold157
MRZV01001545.1	AJAPscaffold1570
MRZV01001546.1	AJAPscaffold1571
MRZV01001547.1	AJAPscaffold1572
MRZV01001548.1	AJAPscaffold1574
MRZV01001549.1	AJAPscaffold1575
MRZV01001550.1	AJAPscaffold1576
MRZV01001551.1	AJAPscaffold1577
MRZV01001552.1	AJAPscaffold1578
MRZV01001553.1	AJAPscaffold1579
MRZV01000158.1	AJAPscaffold158
MRZV01001554.1	AJAPscaffold1580
MRZV01001555.1	AJAPscaffold1582
MRZV01001556.1	AJAPscaffold1583
MRZV01001557.1	AJAPscaffold1584
MRZV01001558.1	AJAPscaffold1585
MRZV01001559.1	AJAPscaffold1586
MRZV01001560.1	AJAPscaffold1587
MRZV01001561.1	AJAPscaffold1588
MRZV01001562.1	AJAPscaffold1589
MRZV01000159.1	AJAPscaffold159
MRZV01001563.1	AJAPscaffold1590
MRZV01001564.1	AJAPscaffold1591
MRZV01001565.1	AJAPscaffold1592
MRZV01001566.1	AJAPscaffold1593
MRZV01001567.1	AJAPscaffold1594
MRZV01001568.1	AJAPscaffold1596
MRZV01001569.1	AJAPscaffold1597
MRZV01001570.1	AJAPscaffold1598
MRZV01001571.1	AJAPscaffold1599
MRZV01000016.1	AJAPscaffold16
MRZV01000160.1	AJAPscaffold160
MRZV01001572.1	AJAPscaffold1600
MRZV01001573.1	AJAPscaffold1601
MRZV01001574.1	AJAPscaffold1602
MRZV01001575.1	AJAPscaffold1603
MRZV01001576.1	AJAPscaffold1604
MRZV01001577.1	AJAPscaffold1605
MRZV01001578.1	AJAPscaffold1606
MRZV01001579.1	AJAPscaffold1607
MRZV01001580.1	AJAPscaffold1608
MRZV01001581.1	AJAPscaffold1609
MRZV01000161.1	AJAPscaffold161
MRZV01001582.1	AJAPscaffold1610
MRZV01001583.1	AJAPscaffold1611
MRZV01001584.1	AJAPscaffold1612
MRZV01001585.1	AJAPscaffold1613
MRZV01001586.1	AJAPscaffold1614
MRZV01001587.1	AJAPscaffold1615
MRZV01001588.1	AJAPscaffold1616
MRZV01001589.1	AJAPscaffold1617
MRZV01001590.1	AJAPscaffold1618
MRZV01001591.1	AJAPscaffold1619
MRZV01000162.1	AJAPscaffold162
MRZV01001592.1	AJAPscaffold1620
MRZV01001593.1	AJAPscaffold1621
MRZV01001594.1	AJAPscaffold1622
MRZV01001595.1	AJAPscaffold1624
MRZV01001596.1	AJAPscaffold1625
MRZV01001597.1	AJAPscaffold1626
MRZV01001598.1	AJAPscaffold1627
MRZV01001599.1	AJAPscaffold1628
MRZV01001600.1	AJAPscaffold1629
MRZV01000163.1	AJAPscaffold163
MRZV01001601.1	AJAPscaffold1630
MRZV01001602.1	AJAPscaffold1631
MRZV01001603.1	AJAPscaffold1632
MRZV01001604.1	AJAPscaffold1633
MRZV01001605.1	AJAPscaffold1634
MRZV01001606.1	AJAPscaffold1635
MRZV01001607.1	AJAPscaffold1636
MRZV01001608.1	AJAPscaffold1637
MRZV01001609.1	AJAPscaffold1638
MRZV01001610.1	AJAPscaffold1639
MRZV01000164.1	AJAPscaffold164
MRZV01001611.1	AJAPscaffold1640
MRZV01001612.1	AJAPscaffold1641
MRZV01001613.1	AJAPscaffold1642
MRZV01001614.1	AJAPscaffold1643
MRZV01001615.1	AJAPscaffold1644
MRZV01001616.1	AJAPscaffold1645
MRZV01001617.1	AJAPscaffold1646
MRZV01001618.1	AJAPscaffold1647
MRZV01001619.1	AJAPscaffold1648
MRZV01001620.1	AJAPscaffold1649
MRZV01000165.1	AJAPscaffold165
MRZV01001621.1	AJAPscaffold1650
MRZV01001622.1	AJAPscaffold1651
MRZV01001623.1	AJAPscaffold1652
MRZV01001624.1	AJAPscaffold1653
MRZV01001625.1	AJAPscaffold1654
MRZV01001626.1	AJAPscaffold1655
MRZV01001627.1	AJAPscaffold1656
MRZV01001628.1	AJAPscaffold1657
MRZV01001629.1	AJAPscaffold1658
MRZV01001630.1	AJAPscaffold1659
MRZV01000166.1	AJAPscaffold166
MRZV01001631.1	AJAPscaffold1661
MRZV01001632.1	AJAPscaffold1662
MRZV01001633.1	AJAPscaffold1663
MRZV01001634.1	AJAPscaffold1665
MRZV01001635.1	AJAPscaffold1666
MRZV01001636.1	AJAPscaffold1667
MRZV01001637.1	AJAPscaffold1668
MRZV01001638.1	AJAPscaffold1669
MRZV01000167.1	AJAPscaffold167
MRZV01001639.1	AJAPscaffold1670
MRZV01001640.1	AJAPscaffold1671
MRZV01001641.1	AJAPscaffold1672
MRZV01001642.1	AJAPscaffold1673
MRZV01001643.1	AJAPscaffold1674
MRZV01001644.1	AJAPscaffold1675
MRZV01001645.1	AJAPscaffold1676
MRZV01001646.1	AJAPscaffold1677
MRZV01001647.1	AJAPscaffold1678
MRZV01000168.1	AJAPscaffold168
MRZV01001648.1	AJAPscaffold1680
MRZV01001649.1	AJAPscaffold1681
MRZV01001650.1	AJAPscaffold1682
MRZV01001651.1	AJAPscaffold1683
MRZV01001652.1	AJAPscaffold1684
MRZV01001653.1	AJAPscaffold1685
MRZV01001654.1	AJAPscaffold1686
MRZV01001655.1	AJAPscaffold1687
MRZV01001656.1	AJAPscaffold1688
MRZV01001657.1	AJAPscaffold1689
MRZV01000169.1	AJAPscaffold169
MRZV01001658.1	AJAPscaffold1690
MRZV01001659.1	AJAPscaffold1691
MRZV01001660.1	AJAPscaffold1692
MRZV01001661.1	AJAPscaffold1693
MRZV01001662.1	AJAPscaffold1694
MRZV01001663.1	AJAPscaffold1696
MRZV01001664.1	AJAPscaffold1697
MRZV01001665.1	AJAPscaffold1698
MRZV01001666.1	AJAPscaffold1699
MRZV01000017.1	AJAPscaffold17
MRZV01000170.1	AJAPscaffold170
MRZV01001667.1	AJAPscaffold1700
MRZV01001668.1	AJAPscaffold1701
MRZV01001669.1	AJAPscaffold1702
MRZV01001670.1	AJAPscaffold1703
MRZV01001671.1	AJAPscaffold1704
MRZV01001672.1	AJAPscaffold1705
MRZV01001673.1	AJAPscaffold1707
MRZV01001674.1	AJAPscaffold1708
MRZV01001675.1	AJAPscaffold1709
MRZV01000171.1	AJAPscaffold171
MRZV01001676.1	AJAPscaffold1711
MRZV01001677.1	AJAPscaffold1712
MRZV01001678.1	AJAPscaffold1713
MRZV01001679.1	AJAPscaffold1714
MRZV01001680.1	AJAPscaffold1715
MRZV01001681.1	AJAPscaffold1716
MRZV01001682.1	AJAPscaffold1717
MRZV01001683.1	AJAPscaffold1718
MRZV01001684.1	AJAPscaffold1719
MRZV01000172.1	AJAPscaffold172
MRZV01001685.1	AJAPscaffold1720
MRZV01001686.1	AJAPscaffold1721
MRZV01001687.1	AJAPscaffold1724
MRZV01001688.1	AJAPscaffold1725
MRZV01001689.1	AJAPscaffold1726
MRZV01001690.1	AJAPscaffold1727
MRZV01001691.1	AJAPscaffold1728
MRZV01001692.1	AJAPscaffold1729
MRZV01000173.1	AJAPscaffold173
MRZV01001693.1	AJAPscaffold1730
MRZV01001694.1	AJAPscaffold1731
MRZV01001695.1	AJAPscaffold1732
MRZV01001696.1	AJAPscaffold1733
MRZV01001697.1	AJAPscaffold1734
MRZV01001698.1	AJAPscaffold1735
MRZV01001699.1	AJAPscaffold1736
MRZV01001700.1	AJAPscaffold1737
MRZV01001701.1	AJAPscaffold1739
MRZV01000174.1	AJAPscaffold174
MRZV01001702.1	AJAPscaffold1740
MRZV01001703.1	AJAPscaffold1741
MRZV01001704.1	AJAPscaffold1742
MRZV01001705.1	AJAPscaffold1743
MRZV01001706.1	AJAPscaffold1744
MRZV01001707.1	AJAPscaffold1745
MRZV01001708.1	AJAPscaffold1746
MRZV01001709.1	AJAPscaffold1747
MRZV01001710.1	AJAPscaffold1748
MRZV01001711.1	AJAPscaffold1749
MRZV01000175.1	AJAPscaffold175
MRZV01001712.1	AJAPscaffold1750
MRZV01001713.1	AJAPscaffold1751
MRZV01001714.1	AJAPscaffold1752
MRZV01001715.1	AJAPscaffold1754
MRZV01001716.1	AJAPscaffold1755
MRZV01001717.1	AJAPscaffold1756
MRZV01001718.1	AJAPscaffold1757
MRZV01001719.1	AJAPscaffold1758
MRZV01000176.1	AJAPscaffold176
MRZV01001720.1	AJAPscaffold1760
MRZV01001721.1	AJAPscaffold1761
MRZV01001722.1	AJAPscaffold1762
MRZV01001723.1	AJAPscaffold1763
MRZV01001724.1	AJAPscaffold1764
MRZV01001725.1	AJAPscaffold1765
MRZV01001726.1	AJAPscaffold1766
MRZV01001727.1	AJAPscaffold1767
MRZV01001728.1	AJAPscaffold1768
MRZV01001729.1	AJAPscaffold1769
MRZV01000177.1	AJAPscaffold177
MRZV01001730.1	AJAPscaffold1770
MRZV01001731.1	AJAPscaffold1771
MRZV01001732.1	AJAPscaffold1773
MRZV01001733.1	AJAPscaffold1775
MRZV01001734.1	AJAPscaffold1776
MRZV01001735.1	AJAPscaffold1777
MRZV01001736.1	AJAPscaffold1778
MRZV01001737.1	AJAPscaffold1779
MRZV01000178.1	AJAPscaffold178
MRZV01001738.1	AJAPscaffold1780
MRZV01001739.1	AJAPscaffold1781
MRZV01001740.1	AJAPscaffold1782
MRZV01001741.1	AJAPscaffold1783
MRZV01001742.1	AJAPscaffold1784
MRZV01001743.1	AJAPscaffold1785
MRZV01001744.1	AJAPscaffold1786
MRZV01001745.1	AJAPscaffold1787
MRZV01001746.1	AJAPscaffold1788
MRZV01001747.1	AJAPscaffold1789
MRZV01000179.1	AJAPscaffold179
MRZV01001748.1	AJAPscaffold1792
MRZV01001749.1	AJAPscaffold1793
MRZV01001750.1	AJAPscaffold1794
MRZV01001751.1	AJAPscaffold1795
MRZV01001752.1	AJAPscaffold1796
MRZV01001753.1	AJAPscaffold1797
MRZV01001754.1	AJAPscaffold1798
MRZV01001755.1	AJAPscaffold1799
MRZV01000018.1	AJAPscaffold18
MRZV01000180.1	AJAPscaffold180
MRZV01001756.1	AJAPscaffold1800
MRZV01001757.1	AJAPscaffold1801
MRZV01001758.1	AJAPscaffold1802
MRZV01001759.1	AJAPscaffold1803
MRZV01001760.1	AJAPscaffold1804
MRZV01001761.1	AJAPscaffold1805
MRZV01001762.1	AJAPscaffold1806
MRZV01001763.1	AJAPscaffold1807
MRZV01001764.1	AJAPscaffold1808
MRZV01001765.1	AJAPscaffold1809
MRZV01000181.1	AJAPscaffold181
MRZV01001766.1	AJAPscaffold1810
MRZV01001767.1	AJAPscaffold1811
MRZV01001768.1	AJAPscaffold1812
MRZV01001769.1	AJAPscaffold1813
MRZV01001770.1	AJAPscaffold1815
MRZV01001771.1	AJAPscaffold1816
MRZV01001772.1	AJAPscaffold1817
MRZV01001773.1	AJAPscaffold1818
MRZV01001774.1	AJAPscaffold1819
MRZV01000182.1	AJAPscaffold182
MRZV01001775.1	AJAPscaffold1820
MRZV01001776.1	AJAPscaffold1821
MRZV01001777.1	AJAPscaffold1822
MRZV01001778.1	AJAPscaffold1823
MRZV01001779.1	AJAPscaffold1824
MRZV01001780.1	AJAPscaffold1825
MRZV01001781.1	AJAPscaffold1826
MRZV01001782.1	AJAPscaffold1827
MRZV01001783.1	AJAPscaffold1828
MRZV01001784.1	AJAPscaffold1829
MRZV01000183.1	AJAPscaffold183
MRZV01001785.1	AJAPscaffold1830
MRZV01001786.1	AJAPscaffold1831
MRZV01001787.1	AJAPscaffold1832
MRZV01001788.1	AJAPscaffold1833
MRZV01001789.1	AJAPscaffold1834
MRZV01001790.1	AJAPscaffold1835
MRZV01001791.1	AJAPscaffold1836
MRZV01001792.1	AJAPscaffold1837
MRZV01001793.1	AJAPscaffold1838
MRZV01001794.1	AJAPscaffold1839
MRZV01000184.1	AJAPscaffold184
MRZV01001795.1	AJAPscaffold1840
MRZV01001796.1	AJAPscaffold1841
MRZV01001797.1	AJAPscaffold1842
MRZV01001798.1	AJAPscaffold1843
MRZV01001799.1	AJAPscaffold1845
MRZV01001800.1	AJAPscaffold1846
MRZV01001801.1	AJAPscaffold1848
MRZV01001802.1	AJAPscaffold1849
MRZV01000185.1	AJAPscaffold185
MRZV01001803.1	AJAPscaffold1850
MRZV01001804.1	AJAPscaffold1851
MRZV01001805.1	AJAPscaffold1852
MRZV01001806.1	AJAPscaffold1853
MRZV01001807.1	AJAPscaffold1854
MRZV01001808.1	AJAPscaffold1855
MRZV01001809.1	AJAPscaffold1856
MRZV01001810.1	AJAPscaffold1857
MRZV01001811.1	AJAPscaffold1858
MRZV01001812.1	AJAPscaffold1859
MRZV01000186.1	AJAPscaffold186
MRZV01001813.1	AJAPscaffold1860
MRZV01001814.1	AJAPscaffold1861
MRZV01001815.1	AJAPscaffold1862
MRZV01001816.1	AJAPscaffold1863
MRZV01001817.1	AJAPscaffold1864
MRZV01001818.1	AJAPscaffold1865
MRZV01001819.1	AJAPscaffold1866
MRZV01001820.1	AJAPscaffold1867
MRZV01001821.1	AJAPscaffold1868
MRZV01001822.1	AJAPscaffold1869
MRZV01000187.1	AJAPscaffold187
MRZV01001823.1	AJAPscaffold1870
MRZV01001824.1	AJAPscaffold1871
MRZV01001825.1	AJAPscaffold1872
MRZV01001826.1	AJAPscaffold1873
MRZV01001827.1	AJAPscaffold1874
MRZV01001828.1	AJAPscaffold1875
MRZV01001829.1	AJAPscaffold1876
MRZV01001830.1	AJAPscaffold1877
MRZV01001831.1	AJAPscaffold1878
MRZV01000188.1	AJAPscaffold188
MRZV01001832.1	AJAPscaffold1880
MRZV01001833.1	AJAPscaffold1881
MRZV01001834.1	AJAPscaffold1882
MRZV01001835.1	AJAPscaffold1883
MRZV01001836.1	AJAPscaffold1884
MRZV01001837.1	AJAPscaffold1886
MRZV01001838.1	AJAPscaffold1887
MRZV01001839.1	AJAPscaffold1888
MRZV01001840.1	AJAPscaffold1889
MRZV01000189.1	AJAPscaffold189
MRZV01001841.1	AJAPscaffold1890
MRZV01001842.1	AJAPscaffold1891
MRZV01001843.1	AJAPscaffold1892
MRZV01001844.1	AJAPscaffold1893
MRZV01001845.1	AJAPscaffold1894
MRZV01001846.1	AJAPscaffold1895
MRZV01001847.1	AJAPscaffold1896
MRZV01001848.1	AJAPscaffold1897
MRZV01001849.1	AJAPscaffold1898
MRZV01001850.1	AJAPscaffold1899
MRZV01000019.1	AJAPscaffold19
MRZV01000190.1	AJAPscaffold190
MRZV01001851.1	AJAPscaffold1900
MRZV01001852.1	AJAPscaffold1902
MRZV01001853.1	AJAPscaffold1903
MRZV01001854.1	AJAPscaffold1904
MRZV01001855.1	AJAPscaffold1905
MRZV01001856.1	AJAPscaffold1906
MRZV01001857.1	AJAPscaffold1907
MRZV01001858.1	AJAPscaffold1908
MRZV01001859.1	AJAPscaffold1909
MRZV01000191.1	AJAPscaffold191
MRZV01001860.1	AJAPscaffold1910
MRZV01001861.1	AJAPscaffold1911
MRZV01001862.1	AJAPscaffold1912
MRZV01001863.1	AJAPscaffold1913
MRZV01001864.1	AJAPscaffold1914
MRZV01001865.1	AJAPscaffold1915
MRZV01001866.1	AJAPscaffold1916
MRZV01001867.1	AJAPscaffold1917
MRZV01001868.1	AJAPscaffold1918
MRZV01001869.1	AJAPscaffold1919
MRZV01001870.1	AJAPscaffold1920
MRZV01001871.1	AJAPscaffold1921
MRZV01001872.1	AJAPscaffold1922
MRZV01001873.1	AJAPscaffold1923
MRZV01001874.1	AJAPscaffold1924
MRZV01001875.1	AJAPscaffold1925
MRZV01001876.1	AJAPscaffold1926
MRZV01001877.1	AJAPscaffold1927
MRZV01001878.1	AJAPscaffold1928
MRZV01001879.1	AJAPscaffold1929
MRZV01000192.1	AJAPscaffold193
MRZV01001880.1	AJAPscaffold1930
MRZV01001881.1	AJAPscaffold1931
MRZV01001882.1	AJAPscaffold1932
MRZV01001883.1	AJAPscaffold1933
MRZV01001884.1	AJAPscaffold1934
MRZV01001885.1	AJAPscaffold1935
MRZV01001886.1	AJAPscaffold1936
MRZV01001887.1	AJAPscaffold1937
MRZV01001888.1	AJAPscaffold1938
MRZV01001889.1	AJAPscaffold1939
MRZV01000193.1	AJAPscaffold194
MRZV01001890.1	AJAPscaffold1940
MRZV01001891.1	AJAPscaffold1941
MRZV01001892.1	AJAPscaffold1942
MRZV01001893.1	AJAPscaffold1943
MRZV01001894.1	AJAPscaffold1945
MRZV01001895.1	AJAPscaffold1946
MRZV01001896.1	AJAPscaffold1947
MRZV01001897.1	AJAPscaffold1948
MRZV01001898.1	AJAPscaffold1949
MRZV01000194.1	AJAPscaffold195
MRZV01001899.1	AJAPscaffold1951
MRZV01001900.1	AJAPscaffold1952
MRZV01001901.1	AJAPscaffold1953
MRZV01001902.1	AJAPscaffold1954
MRZV01001903.1	AJAPscaffold1955
MRZV01001904.1	AJAPscaffold1956
MRZV01001905.1	AJAPscaffold1957
MRZV01001906.1	AJAPscaffold1958
MRZV01001907.1	AJAPscaffold1959
MRZV01000195.1	AJAPscaffold196
MRZV01001908.1	AJAPscaffold1960
MRZV01001909.1	AJAPscaffold1961
MRZV01001910.1	AJAPscaffold1962
MRZV01001911.1	AJAPscaffold1963
MRZV01001912.1	AJAPscaffold1964
MRZV01001913.1	AJAPscaffold1965
MRZV01001914.1	AJAPscaffold1966
MRZV01001915.1	AJAPscaffold1967
MRZV01001916.1	AJAPscaffold1968
MRZV01000196.1	AJAPscaffold197
MRZV01001917.1	AJAPscaffold1970
MRZV01001918.1	AJAPscaffold1971
MRZV01001919.1	AJAPscaffold1972
MRZV01001920.1	AJAPscaffold1973
MRZV01001921.1	AJAPscaffold1975
MRZV01001922.1	AJAPscaffold1976
MRZV01001923.1	AJAPscaffold1977
MRZV01001924.1	AJAPscaffold1978
MRZV01001925.1	AJAPscaffold1979
MRZV01000197.1	AJAPscaffold198
MRZV01001926.1	AJAPscaffold1980
MRZV01001927.1	AJAPscaffold1981
MRZV01001928.1	AJAPscaffold1982
MRZV01001929.1	AJAPscaffold1983
MRZV01001930.1	AJAPscaffold1984
MRZV01001931.1	AJAPscaffold1985
MRZV01001932.1	AJAPscaffold1986
MRZV01001933.1	AJAPscaffold1987
MRZV01001934.1	AJAPscaffold1988
MRZV01001935.1	AJAPscaffold1989
MRZV01000198.1	AJAPscaffold199
MRZV01001936.1	AJAPscaffold1990
MRZV01001937.1	AJAPscaffold1991
MRZV01001938.1	AJAPscaffold1992
MRZV01001939.1	AJAPscaffold1993
MRZV01001940.1	AJAPscaffold1994
MRZV01001941.1	AJAPscaffold1995
MRZV01001942.1	AJAPscaffold1996
MRZV01001943.1	AJAPscaffold1997
MRZV01001944.1	AJAPscaffold1998
MRZV01001945.1	AJAPscaffold1999
MRZV01000002.1	AJAPscaffold2
MRZV01000020.1	AJAPscaffold20
MRZV01000199.1	AJAPscaffold200
MRZV01001946.1	AJAPscaffold2000
MRZV01001947.1	AJAPscaffold2001
MRZV01001948.1	AJAPscaffold2002
MRZV01001949.1	AJAPscaffold2003
MRZV01001950.1	AJAPscaffold2004
MRZV01001951.1	AJAPscaffold2005
MRZV01001952.1	AJAPscaffold2006
MRZV01001953.1	AJAPscaffold2007
MRZV01001954.1	AJAPscaffold2008
MRZV01001955.1	AJAPscaffold2009
MRZV01000200.1	AJAPscaffold201
MRZV01001956.1	AJAPscaffold2010
MRZV01001957.1	AJAPscaffold2011
MRZV01001958.1	AJAPscaffold2012
MRZV01001959.1	AJAPscaffold2013
MRZV01001960.1	AJAPscaffold2014
MRZV01001961.1	AJAPscaffold2015
MRZV01001962.1	AJAPscaffold2016
MRZV01001963.1	AJAPscaffold2018
MRZV01001964.1	AJAPscaffold2019
MRZV01000201.1	AJAPscaffold202
MRZV01001965.1	AJAPscaffold2020
MRZV01001966.1	AJAPscaffold2021
MRZV01001967.1	AJAPscaffold2023
MRZV01001968.1	AJAPscaffold2024
MRZV01001969.1	AJAPscaffold2025
MRZV01001970.1	AJAPscaffold2026
MRZV01001971.1	AJAPscaffold2027
MRZV01001972.1	AJAPscaffold2028
MRZV01001973.1	AJAPscaffold2029
MRZV01000202.1	AJAPscaffold203
MRZV01001974.1	AJAPscaffold2030
MRZV01001975.1	AJAPscaffold2031
MRZV01001976.1	AJAPscaffold2032
MRZV01001977.1	AJAPscaffold2033
MRZV01001978.1	AJAPscaffold2034
MRZV01001979.1	AJAPscaffold2035
MRZV01001980.1	AJAPscaffold2036
MRZV01001981.1	AJAPscaffold2037
MRZV01001982.1	AJAPscaffold2038
MRZV01001983.1	AJAPscaffold2039
MRZV01000203.1	AJAPscaffold204
MRZV01001984.1	AJAPscaffold2040
MRZV01001985.1	AJAPscaffold2041
MRZV01001986.1	AJAPscaffold2042
MRZV01001987.1	AJAPscaffold2043
MRZV01001988.1	AJAPscaffold2044
MRZV01001989.1	AJAPscaffold2045
MRZV01001990.1	AJAPscaffold2046
MRZV01001991.1	AJAPscaffold2047
MRZV01001992.1	AJAPscaffold2048
MRZV01001993.1	AJAPscaffold2049
MRZV01000204.1	AJAPscaffold205
MRZV01001994.1	AJAPscaffold2050
MRZV01001995.1	AJAPscaffold2051
MRZV01001996.1	AJAPscaffold2052
MRZV01001997.1	AJAPscaffold2053
MRZV01001998.1	AJAPscaffold2054
MRZV01001999.1	AJAPscaffold2055
MRZV01002000.1	AJAPscaffold2056
MRZV01002001.1	AJAPscaffold2057
MRZV01002002.1	AJAPscaffold2058
MRZV01002003.1	AJAPscaffold2059
MRZV01000205.1	AJAPscaffold206
MRZV01002004.1	AJAPscaffold2060
MRZV01002005.1	AJAPscaffold2061
MRZV01002006.1	AJAPscaffold2062
MRZV01002007.1	AJAPscaffold2063
MRZV01002008.1	AJAPscaffold2064
MRZV01002009.1	AJAPscaffold2065
MRZV01002010.1	AJAPscaffold2067
MRZV01002011.1	AJAPscaffold2069
MRZV01000206.1	AJAPscaffold207
MRZV01002012.1	AJAPscaffold2071
MRZV01002013.1	AJAPscaffold2072
MRZV01002014.1	AJAPscaffold2073
MRZV01002015.1	AJAPscaffold2074
MRZV01002016.1	AJAPscaffold2075
MRZV01002017.1	AJAPscaffold2076
MRZV01002018.1	AJAPscaffold2077
MRZV01002019.1	AJAPscaffold2078
MRZV01002020.1	AJAPscaffold2079
MRZV01000207.1	AJAPscaffold208
MRZV01002021.1	AJAPscaffold2080
MRZV01002022.1	AJAPscaffold2081
MRZV01002023.1	AJAPscaffold2082
MRZV01002024.1	AJAPscaffold2083
MRZV01002025.1	AJAPscaffold2084
MRZV01002026.1	AJAPscaffold2085
MRZV01002027.1	AJAPscaffold2086
MRZV01002028.1	AJAPscaffold2087
MRZV01002029.1	AJAPscaffold2088
MRZV01002030.1	AJAPscaffold2089
MRZV01000208.1	AJAPscaffold209
MRZV01002031.1	AJAPscaffold2090
MRZV01002032.1	AJAPscaffold2091
MRZV01002033.1	AJAPscaffold2092
MRZV01002034.1	AJAPscaffold2093
MRZV01002035.1	AJAPscaffold2095
MRZV01002036.1	AJAPscaffold2096
MRZV01002037.1	AJAPscaffold2097
MRZV01002038.1	AJAPscaffold2098
MRZV01002039.1	AJAPscaffold2099
MRZV01000021.1	AJAPscaffold21
MRZV01000209.1	AJAPscaffold210
MRZV01002040.1	AJAPscaffold2100
MRZV01002041.1	AJAPscaffold2101
MRZV01002042.1	AJAPscaffold2102
MRZV01002043.1	AJAPscaffold2103
MRZV01002044.1	AJAPscaffold2104
MRZV01002045.1	AJAPscaffold2105
MRZV01002046.1	AJAPscaffold2106
MRZV01002047.1	AJAPscaffold2108
MRZV01002048.1	AJAPscaffold2109
MRZV01000210.1	AJAPscaffold211
MRZV01002049.1	AJAPscaffold2110
MRZV01002050.1	AJAPscaffold2111
MRZV01002051.1	AJAPscaffold2112
MRZV01002052.1	AJAPscaffold2113
MRZV01002053.1	AJAPscaffold2115
MRZV01002054.1	AJAPscaffold2116
MRZV01002055.1	AJAPscaffold2117
MRZV01002056.1	AJAPscaffold2118
MRZV01000211.1	AJAPscaffold212
MRZV01002057.1	AJAPscaffold2120
MRZV01002058.1	AJAPscaffold2121
MRZV01002059.1	AJAPscaffold2122
MRZV01002060.1	AJAPscaffold2123
MRZV01002061.1	AJAPscaffold2124
MRZV01002062.1	AJAPscaffold2125
MRZV01002063.1	AJAPscaffold2126
MRZV01002064.1	AJAPscaffold2127
MRZV01002065.1	AJAPscaffold2128
MRZV01002066.1	AJAPscaffold2129
MRZV01000212.1	AJAPscaffold213
MRZV01002067.1	AJAPscaffold2130
MRZV01002068.1	AJAPscaffold2131
MRZV01002069.1	AJAPscaffold2132
MRZV01002070.1	AJAPscaffold2133
MRZV01002071.1	AJAPscaffold2134
MRZV01002072.1	AJAPscaffold2135
MRZV01002073.1	AJAPscaffold2136
MRZV01002074.1	AJAPscaffold2137
MRZV01002075.1	AJAPscaffold2138
MRZV01002076.1	AJAPscaffold2139
MRZV01000213.1	AJAPscaffold214
MRZV01002077.1	AJAPscaffold2140
MRZV01002078.1	AJAPscaffold2142
MRZV01002079.1	AJAPscaffold2143
MRZV01002080.1	AJAPscaffold2144
MRZV01002081.1	AJAPscaffold2145
MRZV01002082.1	AJAPscaffold2146
MRZV01002083.1	AJAPscaffold2148
MRZV01002084.1	AJAPscaffold2149
MRZV01000214.1	AJAPscaffold215
MRZV01002085.1	AJAPscaffold2150
MRZV01002086.1	AJAPscaffold2152
MRZV01002087.1	AJAPscaffold2155
MRZV01002088.1	AJAPscaffold2157
MRZV01002089.1	AJAPscaffold2158
MRZV01002090.1	AJAPscaffold2159
MRZV01000215.1	AJAPscaffold216
MRZV01002091.1	AJAPscaffold2160
MRZV01002092.1	AJAPscaffold2161
MRZV01002093.1	AJAPscaffold2162
MRZV01002094.1	AJAPscaffold2163
MRZV01002095.1	AJAPscaffold2164
MRZV01002096.1	AJAPscaffold2165
MRZV01002097.1	AJAPscaffold2166
MRZV01002098.1	AJAPscaffold2167
MRZV01002099.1	AJAPscaffold2168
MRZV01002100.1	AJAPscaffold2169
MRZV01000216.1	AJAPscaffold217
MRZV01002101.1	AJAPscaffold2170
MRZV01002102.1	AJAPscaffold2171
MRZV01002103.1	AJAPscaffold2172
MRZV01002104.1	AJAPscaffold2173
MRZV01002105.1	AJAPscaffold2174
MRZV01002106.1	AJAPscaffold2175
MRZV01002107.1	AJAPscaffold2176
MRZV01002108.1	AJAPscaffold2178
MRZV01002109.1	AJAPscaffold2179
MRZV01000217.1	AJAPscaffold218
MRZV01002110.1	AJAPscaffold2180
MRZV01002111.1	AJAPscaffold2181
MRZV01002112.1	AJAPscaffold2182
MRZV01002113.1	AJAPscaffold2183
MRZV01002114.1	AJAPscaffold2184
MRZV01002115.1	AJAPscaffold2185
MRZV01002116.1	AJAPscaffold2186
MRZV01002117.1	AJAPscaffold2187
MRZV01002118.1	AJAPscaffold2189
MRZV01000218.1	AJAPscaffold219
MRZV01002119.1	AJAPscaffold2190
MRZV01002120.1	AJAPscaffold2191
MRZV01002121.1	AJAPscaffold2192
MRZV01002122.1	AJAPscaffold2193
MRZV01002123.1	AJAPscaffold2194
MRZV01002124.1	AJAPscaffold2195
MRZV01002125.1	AJAPscaffold2196
MRZV01002126.1	AJAPscaffold2198
MRZV01000022.1	AJAPscaffold22
MRZV01000219.1	AJAPscaffold220
MRZV01002127.1	AJAPscaffold2200
MRZV01002128.1	AJAPscaffold2201
MRZV01002129.1	AJAPscaffold2202
MRZV01002130.1	AJAPscaffold2203
MRZV01002131.1	AJAPscaffold2204
MRZV01002132.1	AJAPscaffold2205
MRZV01002133.1	AJAPscaffold2206
MRZV01002134.1	AJAPscaffold2207
MRZV01002135.1	AJAPscaffold2208
MRZV01002136.1	AJAPscaffold2209
MRZV01000220.1	AJAPscaffold221
MRZV01002137.1	AJAPscaffold2210
MRZV01002138.1	AJAPscaffold2211
MRZV01002139.1	AJAPscaffold2212
MRZV01002140.1	AJAPscaffold2213
MRZV01002141.1	AJAPscaffold2214
MRZV01002142.1	AJAPscaffold2215
MRZV01002143.1	AJAPscaffold2216
MRZV01002144.1	AJAPscaffold2217
MRZV01002145.1	AJAPscaffold2218
MRZV01002146.1	AJAPscaffold2219
MRZV01000221.1	AJAPscaffold222
MRZV01002147.1	AJAPscaffold2220
MRZV01002148.1	AJAPscaffold2221
MRZV01002149.1	AJAPscaffold2222
MRZV01002150.1	AJAPscaffold2223
MRZV01002151.1	AJAPscaffold2224
MRZV01002152.1	AJAPscaffold2225
MRZV01002153.1	AJAPscaffold2226
MRZV01002154.1	AJAPscaffold2227
MRZV01002155.1	AJAPscaffold2229
MRZV01000222.1	AJAPscaffold223
MRZV01002156.1	AJAPscaffold2230
MRZV01002157.1	AJAPscaffold2231
MRZV01002158.1	AJAPscaffold2232
MRZV01002159.1	AJAPscaffold2233
MRZV01002160.1	AJAPscaffold2234
MRZV01002161.1	AJAPscaffold2235
MRZV01002162.1	AJAPscaffold2236
MRZV01002163.1	AJAPscaffold2238
MRZV01002164.1	AJAPscaffold2239
MRZV01000223.1	AJAPscaffold224
MRZV01002165.1	AJAPscaffold2240
MRZV01002166.1	AJAPscaffold2241
MRZV01002167.1	AJAPscaffold2242
MRZV01002168.1	AJAPscaffold2243
MRZV01002169.1	AJAPscaffold2244
MRZV01002170.1	AJAPscaffold2245
MRZV01002171.1	AJAPscaffold2246
MRZV01002172.1	AJAPscaffold2247
MRZV01002173.1	AJAPscaffold2248
MRZV01002174.1	AJAPscaffold2249
MRZV01000224.1	AJAPscaffold225
MRZV01002175.1	AJAPscaffold2250
MRZV01002176.1	AJAPscaffold2251
MRZV01002177.1	AJAPscaffold2252
MRZV01002178.1	AJAPscaffold2253
MRZV01002179.1	AJAPscaffold2254
MRZV01002180.1	AJAPscaffold2255
MRZV01002181.1	AJAPscaffold2256
MRZV01002182.1	AJAPscaffold2257
MRZV01002183.1	AJAPscaffold2258
MRZV01002184.1	AJAPscaffold2259
MRZV01000225.1	AJAPscaffold226
MRZV01002185.1	AJAPscaffold2260
MRZV01002186.1	AJAPscaffold2261
MRZV01002187.1	AJAPscaffold2262
MRZV01002188.1	AJAPscaffold2263
MRZV01002189.1	AJAPscaffold2265
MRZV01002190.1	AJAPscaffold2266
MRZV01002191.1	AJAPscaffold2267
MRZV01002192.1	AJAPscaffold2268
MRZV01002193.1	AJAPscaffold2269
MRZV01000226.1	AJAPscaffold227
MRZV01002194.1	AJAPscaffold2270
MRZV01002195.1	AJAPscaffold2271
MRZV01002196.1	AJAPscaffold2272
MRZV01002197.1	AJAPscaffold2273
MRZV01002198.1	AJAPscaffold2274
MRZV01002199.1	AJAPscaffold2275
MRZV01002200.1	AJAPscaffold2276
MRZV01002201.1	AJAPscaffold2277
MRZV01002202.1	AJAPscaffold2278
MRZV01002203.1	AJAPscaffold2279
MRZV01000227.1	AJAPscaffold228
MRZV01002204.1	AJAPscaffold2280
MRZV01002205.1	AJAPscaffold2281
MRZV01002206.1	AJAPscaffold2282
MRZV01002207.1	AJAPscaffold2283
MRZV01002208.1	AJAPscaffold2284
MRZV01002209.1	AJAPscaffold2286
MRZV01002210.1	AJAPscaffold2287
MRZV01002211.1	AJAPscaffold2288
MRZV01002212.1	AJAPscaffold2289
MRZV01000228.1	AJAPscaffold229
MRZV01002213.1	AJAPscaffold2290
MRZV01002214.1	AJAPscaffold2291
MRZV01002215.1	AJAPscaffold2292
MRZV01002216.1	AJAPscaffold2293
MRZV01002217.1	AJAPscaffold2294
MRZV01002218.1	AJAPscaffold2295
MRZV01002219.1	AJAPscaffold2296
MRZV01002220.1	AJAPscaffold2297
MRZV01002221.1	AJAPscaffold2298
MRZV01002222.1	AJAPscaffold2299
MRZV01000023.1	AJAPscaffold23
MRZV01000229.1	AJAPscaffold230
MRZV01002223.1	AJAPscaffold2300
MRZV01002224.1	AJAPscaffold2301
MRZV01002225.1	AJAPscaffold2302
MRZV01002226.1	AJAPscaffold2303
MRZV01002227.1	AJAPscaffold2304
MRZV01002228.1	AJAPscaffold2305
MRZV01002229.1	AJAPscaffold2307
MRZV01002230.1	AJAPscaffold2308
MRZV01002231.1	AJAPscaffold2309
MRZV01000230.1	AJAPscaffold231
MRZV01002232.1	AJAPscaffold2310
MRZV01002233.1	AJAPscaffold2311
MRZV01002234.1	AJAPscaffold2312
MRZV01002235.1	AJAPscaffold2313
MRZV01002236.1	AJAPscaffold2314
MRZV01002237.1	AJAPscaffold2315
MRZV01002238.1	AJAPscaffold2316
MRZV01002239.1	AJAPscaffold2317
MRZV01002240.1	AJAPscaffold2318
MRZV01002241.1	AJAPscaffold2319
MRZV01000231.1	AJAPscaffold232
MRZV01002242.1	AJAPscaffold2320
MRZV01002243.1	AJAPscaffold2321
MRZV01002244.1	AJAPscaffold2322
MRZV01002245.1	AJAPscaffold2323
MRZV01002246.1	AJAPscaffold2324
MRZV01002247.1	AJAPscaffold2325
MRZV01002248.1	AJAPscaffold2326
MRZV01002249.1	AJAPscaffold2327
MRZV01002250.1	AJAPscaffold2328
MRZV01002251.1	AJAPscaffold2329
MRZV01000232.1	AJAPscaffold233
MRZV01002252.1	AJAPscaffold2330
MRZV01002253.1	AJAPscaffold2331
MRZV01002254.1	AJAPscaffold2332
MRZV01002255.1	AJAPscaffold2334
MRZV01002256.1	AJAPscaffold2335
MRZV01002257.1	AJAPscaffold2336
MRZV01002258.1	AJAPscaffold2337
MRZV01002259.1	AJAPscaffold2338
MRZV01002260.1	AJAPscaffold2339
MRZV01000233.1	AJAPscaffold234
MRZV01002261.1	AJAPscaffold2340
MRZV01002262.1	AJAPscaffold2341
MRZV01002263.1	AJAPscaffold2342
MRZV01002264.1	AJAPscaffold2343
MRZV01002265.1	AJAPscaffold2344
MRZV01002266.1	AJAPscaffold2345
MRZV01002267.1	AJAPscaffold2346
MRZV01002268.1	AJAPscaffold2347
MRZV01002269.1	AJAPscaffold2348
MRZV01000234.1	AJAPscaffold235
MRZV01002270.1	AJAPscaffold2350
MRZV01002271.1	AJAPscaffold2351
MRZV01002272.1	AJAPscaffold2353
MRZV01002273.1	AJAPscaffold2354
MRZV01002274.1	AJAPscaffold2355
MRZV01002275.1	AJAPscaffold2356
MRZV01002276.1	AJAPscaffold2357
MRZV01002277.1	AJAPscaffold2358
MRZV01002278.1	AJAPscaffold2359
MRZV01000235.1	AJAPscaffold236
MRZV01002279.1	AJAPscaffold2360
MRZV01002280.1	AJAPscaffold2361
MRZV01002281.1	AJAPscaffold2362
MRZV01002282.1	AJAPscaffold2363
MRZV01002283.1	AJAPscaffold2364
MRZV01002284.1	AJAPscaffold2365
MRZV01002285.1	AJAPscaffold2366
MRZV01002286.1	AJAPscaffold2367
MRZV01002287.1	AJAPscaffold2368
MRZV01002288.1	AJAPscaffold2369
MRZV01000236.1	AJAPscaffold237
MRZV01002289.1	AJAPscaffold2370
MRZV01002290.1	AJAPscaffold2371
MRZV01002291.1	AJAPscaffold2372
MRZV01002292.1	AJAPscaffold2373
MRZV01002293.1	AJAPscaffold2374
MRZV01002294.1	AJAPscaffold2375
MRZV01002295.1	AJAPscaffold2376
MRZV01002296.1	AJAPscaffold2377
MRZV01002297.1	AJAPscaffold2378
MRZV01002298.1	AJAPscaffold2379
MRZV01000237.1	AJAPscaffold238
MRZV01002299.1	AJAPscaffold2380
MRZV01002300.1	AJAPscaffold2381
MRZV01002301.1	AJAPscaffold2383
MRZV01002302.1	AJAPscaffold2384
MRZV01002303.1	AJAPscaffold2385
MRZV01002304.1	AJAPscaffold2386
MRZV01002305.1	AJAPscaffold2389
MRZV01000238.1	AJAPscaffold239
MRZV01002306.1	AJAPscaffold2391
MRZV01002307.1	AJAPscaffold2392
MRZV01002308.1	AJAPscaffold2393
MRZV01002309.1	AJAPscaffold2394
MRZV01002310.1	AJAPscaffold2395
MRZV01002311.1	AJAPscaffold2396
MRZV01002312.1	AJAPscaffold2397
MRZV01002313.1	AJAPscaffold2398
MRZV01000024.1	AJAPscaffold24
MRZV01000239.1	AJAPscaffold240
MRZV01002314.1	AJAPscaffold2400
MRZV01002315.1	AJAPscaffold2401
MRZV01002316.1	AJAPscaffold2402
MRZV01002317.1	AJAPscaffold2405
MRZV01002318.1	AJAPscaffold2406
MRZV01002319.1	AJAPscaffold2407
MRZV01002320.1	AJAPscaffold2409
MRZV01000240.1	AJAPscaffold241
MRZV01002321.1	AJAPscaffold2410
MRZV01002322.1	AJAPscaffold2411
MRZV01002323.1	AJAPscaffold2412
MRZV01002324.1	AJAPscaffold2415
MRZV01002325.1	AJAPscaffold2417
MRZV01002326.1	AJAPscaffold2418
MRZV01002327.1	AJAPscaffold2419
MRZV01000241.1	AJAPscaffold242
MRZV01002328.1	AJAPscaffold2420
MRZV01002329.1	AJAPscaffold2421
MRZV01002330.1	AJAPscaffold2422
MRZV01002331.1	AJAPscaffold2424
MRZV01002332.1	AJAPscaffold2425
MRZV01002333.1	AJAPscaffold2426
MRZV01002334.1	AJAPscaffold2427
MRZV01002335.1	AJAPscaffold2428
MRZV01002336.1	AJAPscaffold2429
MRZV01000242.1	AJAPscaffold243
MRZV01002337.1	AJAPscaffold2430
MRZV01002338.1	AJAPscaffold2431
MRZV01002339.1	AJAPscaffold2432
MRZV01002340.1	AJAPscaffold2434
MRZV01002341.1	AJAPscaffold2435
MRZV01002342.1	AJAPscaffold2436
MRZV01002343.1	AJAPscaffold2437
MRZV01002344.1	AJAPscaffold2438
MRZV01002345.1	AJAPscaffold2439
MRZV01000243.1	AJAPscaffold244
MRZV01002346.1	AJAPscaffold2440
MRZV01002347.1	AJAPscaffold2441
MRZV01002348.1	AJAPscaffold2442
MRZV01002349.1	AJAPscaffold2443
MRZV01002350.1	AJAPscaffold2444
MRZV01002351.1	AJAPscaffold2445
MRZV01002352.1	AJAPscaffold2446
MRZV01002353.1	AJAPscaffold2447
MRZV01002354.1	AJAPscaffold2448
MRZV01002355.1	AJAPscaffold2449
MRZV01000244.1	AJAPscaffold245
MRZV01002356.1	AJAPscaffold2450
MRZV01002357.1	AJAPscaffold2451
MRZV01002358.1	AJAPscaffold2452
MRZV01002359.1	AJAPscaffold2453
MRZV01002360.1	AJAPscaffold2455
MRZV01002361.1	AJAPscaffold2457
MRZV01002362.1	AJAPscaffold2458
MRZV01002363.1	AJAPscaffold2459
MRZV01000245.1	AJAPscaffold246
MRZV01002364.1	AJAPscaffold2460
MRZV01002365.1	AJAPscaffold2461
MRZV01002366.1	AJAPscaffold2462
MRZV01002367.1	AJAPscaffold2463
MRZV01002368.1	AJAPscaffold2464
MRZV01002369.1	AJAPscaffold2465
MRZV01002370.1	AJAPscaffold2466
MRZV01002371.1	AJAPscaffold2467
MRZV01002372.1	AJAPscaffold2468
MRZV01002373.1	AJAPscaffold2469
MRZV01000246.1	AJAPscaffold247
MRZV01002374.1	AJAPscaffold2470
MRZV01002375.1	AJAPscaffold2471
MRZV01002376.1	AJAPscaffold2472
MRZV01002377.1	AJAPscaffold2473
MRZV01002378.1	AJAPscaffold2474
MRZV01002379.1	AJAPscaffold2475
MRZV01002380.1	AJAPscaffold2476
MRZV01002381.1	AJAPscaffold2477
MRZV01002382.1	AJAPscaffold2478
MRZV01002383.1	AJAPscaffold2479
MRZV01000247.1	AJAPscaffold248
MRZV01002384.1	AJAPscaffold2480
MRZV01002385.1	AJAPscaffold2481
MRZV01002386.1	AJAPscaffold2482
MRZV01002387.1	AJAPscaffold2483
MRZV01002388.1	AJAPscaffold2484
MRZV01002389.1	AJAPscaffold2485
MRZV01002390.1	AJAPscaffold2486
MRZV01002391.1	AJAPscaffold2488
MRZV01000248.1	AJAPscaffold249
MRZV01002392.1	AJAPscaffold2490
MRZV01002393.1	AJAPscaffold2491
MRZV01002394.1	AJAPscaffold2492
MRZV01002395.1	AJAPscaffold2493
MRZV01002396.1	AJAPscaffold2494
MRZV01002397.1	AJAPscaffold2496
MRZV01002398.1	AJAPscaffold2497
MRZV01002399.1	AJAPscaffold2498
MRZV01002400.1	AJAPscaffold2499
MRZV01000025.1	AJAPscaffold25
MRZV01000249.1	AJAPscaffold250
MRZV01002401.1	AJAPscaffold2500
MRZV01002402.1	AJAPscaffold2501
MRZV01002403.1	AJAPscaffold2502
MRZV01002404.1	AJAPscaffold2503
MRZV01002405.1	AJAPscaffold2504
MRZV01002406.1	AJAPscaffold2505
MRZV01002407.1	AJAPscaffold2506
MRZV01002408.1	AJAPscaffold2507
MRZV01002409.1	AJAPscaffold2508
MRZV01002410.1	AJAPscaffold2509
MRZV01000250.1	AJAPscaffold251
MRZV01002411.1	AJAPscaffold2510
MRZV01002412.1	AJAPscaffold2511
MRZV01002413.1	AJAPscaffold2512
MRZV01002414.1	AJAPscaffold2513
MRZV01002415.1	AJAPscaffold2514
MRZV01002416.1	AJAPscaffold2516
MRZV01002417.1	AJAPscaffold2517
MRZV01002418.1	AJAPscaffold2518
MRZV01000251.1	AJAPscaffold252
MRZV01002419.1	AJAPscaffold2520
MRZV01002420.1	AJAPscaffold2521
MRZV01002421.1	AJAPscaffold2522
MRZV01002422.1	AJAPscaffold2523
MRZV01002423.1	AJAPscaffold2525
MRZV01002424.1	AJAPscaffold2526
MRZV01002425.1	AJAPscaffold2527
MRZV01002426.1	AJAPscaffold2528
MRZV01000252.1	AJAPscaffold253
MRZV01002427.1	AJAPscaffold2530
MRZV01002428.1	AJAPscaffold2531
MRZV01002429.1	AJAPscaffold2532
MRZV01002430.1	AJAPscaffold2533
MRZV01002431.1	AJAPscaffold2534
MRZV01002432.1	AJAPscaffold2535
MRZV01002433.1	AJAPscaffold2536
MRZV01002434.1	AJAPscaffold2537
MRZV01002435.1	AJAPscaffold2538
MRZV01002436.1	AJAPscaffold2539
MRZV01000253.1	AJAPscaffold254
MRZV01002437.1	AJAPscaffold2540
MRZV01002438.1	AJAPscaffold2541
MRZV01002439.1	AJAPscaffold2542
MRZV01002440.1	AJAPscaffold2543
MRZV01002441.1	AJAPscaffold2544
MRZV01002442.1	AJAPscaffold2545
MRZV01002443.1	AJAPscaffold2546
MRZV01002444.1	AJAPscaffold2547
MRZV01002445.1	AJAPscaffold2548
MRZV01002446.1	AJAPscaffold2549
MRZV01000254.1	AJAPscaffold255
MRZV01002447.1	AJAPscaffold2550
MRZV01002448.1	AJAPscaffold2551
MRZV01002449.1	AJAPscaffold2552
MRZV01002450.1	AJAPscaffold2553
MRZV01002451.1	AJAPscaffold2554
MRZV01002452.1	AJAPscaffold2555
MRZV01002453.1	AJAPscaffold2556
MRZV01002454.1	AJAPscaffold2557
MRZV01002455.1	AJAPscaffold2558
MRZV01002456.1	AJAPscaffold2559
MRZV01000255.1	AJAPscaffold256
MRZV01002457.1	AJAPscaffold2560
MRZV01002458.1	AJAPscaffold2561
MRZV01002459.1	AJAPscaffold2562
MRZV01002460.1	AJAPscaffold2563
MRZV01002461.1	AJAPscaffold2564
MRZV01002462.1	AJAPscaffold2565
MRZV01002463.1	AJAPscaffold2567
MRZV01002464.1	AJAPscaffold2568
MRZV01002465.1	AJAPscaffold2569
MRZV01000256.1	AJAPscaffold257
MRZV01002466.1	AJAPscaffold2570
MRZV01002467.1	AJAPscaffold2571
MRZV01002468.1	AJAPscaffold2572
MRZV01002469.1	AJAPscaffold2573
MRZV01002470.1	AJAPscaffold2574
MRZV01002471.1	AJAPscaffold2575
MRZV01002472.1	AJAPscaffold2576
MRZV01002473.1	AJAPscaffold2577
MRZV01002474.1	AJAPscaffold2578
MRZV01002475.1	AJAPscaffold2579
MRZV01000257.1	AJAPscaffold258
MRZV01002476.1	AJAPscaffold2580
MRZV01002477.1	AJAPscaffold2581
MRZV01002478.1	AJAPscaffold2582
MRZV01002479.1	AJAPscaffold2583
MRZV01002480.1	AJAPscaffold2584
MRZV01002481.1	AJAPscaffold2585
MRZV01002482.1	AJAPscaffold2586
MRZV01002483.1	AJAPscaffold2587
MRZV01002484.1	AJAPscaffold2588
MRZV01002485.1	AJAPscaffold2589
MRZV01000258.1	AJAPscaffold259
MRZV01002486.1	AJAPscaffold2590
MRZV01002487.1	AJAPscaffold2591
MRZV01002488.1	AJAPscaffold2592
MRZV01002489.1	AJAPscaffold2593
MRZV01002490.1	AJAPscaffold2594
MRZV01002491.1	AJAPscaffold2595
MRZV01002492.1	AJAPscaffold2596
MRZV01002493.1	AJAPscaffold2597
MRZV01002494.1	AJAPscaffold2598
MRZV01002495.1	AJAPscaffold2599
MRZV01000026.1	AJAPscaffold26
MRZV01000259.1	AJAPscaffold260
MRZV01002496.1	AJAPscaffold2600
MRZV01002497.1	AJAPscaffold2601
MRZV01002498.1	AJAPscaffold2602
MRZV01002499.1	AJAPscaffold2603
MRZV01002500.1	AJAPscaffold2604
MRZV01002501.1	AJAPscaffold2605
MRZV01002502.1	AJAPscaffold2606
MRZV01002503.1	AJAPscaffold2607
MRZV01002504.1	AJAPscaffold2608
MRZV01002505.1	AJAPscaffold2609
MRZV01000260.1	AJAPscaffold261
MRZV01002506.1	AJAPscaffold2610
MRZV01002507.1	AJAPscaffold2611
MRZV01002508.1	AJAPscaffold2612
MRZV01002509.1	AJAPscaffold2613
MRZV01002510.1	AJAPscaffold2614
MRZV01002511.1	AJAPscaffold2615
MRZV01002512.1	AJAPscaffold2616
MRZV01002513.1	AJAPscaffold2617
MRZV01002514.1	AJAPscaffold2618
MRZV01002515.1	AJAPscaffold2619
MRZV01000261.1	AJAPscaffold262
MRZV01002516.1	AJAPscaffold2620
MRZV01002517.1	AJAPscaffold2621
MRZV01002518.1	AJAPscaffold2623
MRZV01002519.1	AJAPscaffold2624
MRZV01002520.1	AJAPscaffold2625
MRZV01002521.1	AJAPscaffold2626
MRZV01002522.1	AJAPscaffold2627
MRZV01002523.1	AJAPscaffold2628
MRZV01002524.1	AJAPscaffold2629
MRZV01000262.1	AJAPscaffold263
MRZV01002525.1	AJAPscaffold2630
MRZV01002526.1	AJAPscaffold2631
MRZV01002527.1	AJAPscaffold2632
MRZV01002528.1	AJAPscaffold2633
MRZV01002529.1	AJAPscaffold2634
MRZV01002530.1	AJAPscaffold2635
MRZV01002531.1	AJAPscaffold2636
MRZV01002532.1	AJAPscaffold2637
MRZV01002533.1	AJAPscaffold2638
MRZV01002534.1	AJAPscaffold2639
MRZV01000263.1	AJAPscaffold264
MRZV01002535.1	AJAPscaffold2640
MRZV01002536.1	AJAPscaffold2641
MRZV01002537.1	AJAPscaffold2644
MRZV01002538.1	AJAPscaffold2645
MRZV01002539.1	AJAPscaffold2646
MRZV01002540.1	AJAPscaffold2647
MRZV01002541.1	AJAPscaffold2648
MRZV01002542.1	AJAPscaffold2649
MRZV01000264.1	AJAPscaffold265
MRZV01002543.1	AJAPscaffold2650
MRZV01002544.1	AJAPscaffold2651
MRZV01002545.1	AJAPscaffold2652
MRZV01002546.1	AJAPscaffold2653
MRZV01002547.1	AJAPscaffold2654
MRZV01002548.1	AJAPscaffold2655
MRZV01002549.1	AJAPscaffold2656
MRZV01002550.1	AJAPscaffold2657
MRZV01002551.1	AJAPscaffold2658
MRZV01002552.1	AJAPscaffold2659
MRZV01000265.1	AJAPscaffold266
MRZV01002553.1	AJAPscaffold2660
MRZV01002554.1	AJAPscaffold2661
MRZV01002555.1	AJAPscaffold2662
MRZV01002556.1	AJAPscaffold2664
MRZV01002557.1	AJAPscaffold2665
MRZV01002558.1	AJAPscaffold2666
MRZV01002559.1	AJAPscaffold2667
MRZV01002560.1	AJAPscaffold2668
MRZV01002561.1	AJAPscaffold2669
MRZV01000266.1	AJAPscaffold267
MRZV01002562.1	AJAPscaffold2670
MRZV01002563.1	AJAPscaffold2672
MRZV01002564.1	AJAPscaffold2673
MRZV01002565.1	AJAPscaffold2674
MRZV01002566.1	AJAPscaffold2675
MRZV01002567.1	AJAPscaffold2676
MRZV01002568.1	AJAPscaffold2677
MRZV01002569.1	AJAPscaffold2678
MRZV01002570.1	AJAPscaffold2679
MRZV01000267.1	AJAPscaffold268
MRZV01002571.1	AJAPscaffold2680
MRZV01002572.1	AJAPscaffold2681
MRZV01002573.1	AJAPscaffold2682
MRZV01002574.1	AJAPscaffold2683
MRZV01002575.1	AJAPscaffold2684
MRZV01002576.1	AJAPscaffold2685
MRZV01002577.1	AJAPscaffold2686
MRZV01002578.1	AJAPscaffold2687
MRZV01002579.1	AJAPscaffold2688
MRZV01002580.1	AJAPscaffold2689
MRZV01000268.1	AJAPscaffold269
MRZV01002581.1	AJAPscaffold2690
MRZV01002582.1	AJAPscaffold2691
MRZV01002583.1	AJAPscaffold2692
MRZV01002584.1	AJAPscaffold2693
MRZV01002585.1	AJAPscaffold2694
MRZV01002586.1	AJAPscaffold2695
MRZV01002587.1	AJAPscaffold2696
MRZV01002588.1	AJAPscaffold2697
MRZV01002589.1	AJAPscaffold2698
MRZV01000027.1	AJAPscaffold27
MRZV01000269.1	AJAPscaffold270
MRZV01002590.1	AJAPscaffold2700
MRZV01002591.1	AJAPscaffold2702
MRZV01002592.1	AJAPscaffold2703
MRZV01002593.1	AJAPscaffold2704
MRZV01002594.1	AJAPscaffold2705
MRZV01002595.1	AJAPscaffold2706
MRZV01002596.1	AJAPscaffold2707
MRZV01002597.1	AJAPscaffold2709
MRZV01000270.1	AJAPscaffold271
MRZV01002598.1	AJAPscaffold2710
MRZV01002599.1	AJAPscaffold2711
MRZV01002600.1	AJAPscaffold2712
MRZV01002601.1	AJAPscaffold2713
MRZV01002602.1	AJAPscaffold2714
MRZV01002603.1	AJAPscaffold2715
MRZV01002604.1	AJAPscaffold2716
MRZV01002605.1	AJAPscaffold2717
MRZV01002606.1	AJAPscaffold2718
MRZV01002607.1	AJAPscaffold2719
MRZV01000271.1	AJAPscaffold272
MRZV01002608.1	AJAPscaffold2720
MRZV01002609.1	AJAPscaffold2721
MRZV01002610.1	AJAPscaffold2722
MRZV01002611.1	AJAPscaffold2723
MRZV01002612.1	AJAPscaffold2724
MRZV01002613.1	AJAPscaffold2725
MRZV01002614.1	AJAPscaffold2726
MRZV01002615.1	AJAPscaffold2727
MRZV01002616.1	AJAPscaffold2728
MRZV01002617.1	AJAPscaffold2729
MRZV01000272.1	AJAPscaffold273
MRZV01002618.1	AJAPscaffold2730
MRZV01002619.1	AJAPscaffold2731
MRZV01002620.1	AJAPscaffold2732
MRZV01002621.1	AJAPscaffold2733
MRZV01002622.1	AJAPscaffold2734
MRZV01002623.1	AJAPscaffold2735
MRZV01002624.1	AJAPscaffold2736
MRZV01002625.1	AJAPscaffold2737
MRZV01002626.1	AJAPscaffold2738
MRZV01002627.1	AJAPscaffold2739
MRZV01000273.1	AJAPscaffold274
MRZV01002628.1	AJAPscaffold2740
MRZV01002629.1	AJAPscaffold2742
MRZV01002630.1	AJAPscaffold2744
MRZV01002631.1	AJAPscaffold2745
MRZV01002632.1	AJAPscaffold2746
MRZV01002633.1	AJAPscaffold2747
MRZV01002634.1	AJAPscaffold2748
MRZV01002635.1	AJAPscaffold2749
MRZV01000274.1	AJAPscaffold275
MRZV01002636.1	AJAPscaffold2750
MRZV01002637.1	AJAPscaffold2751
MRZV01002638.1	AJAPscaffold2752
MRZV01002639.1	AJAPscaffold2753
MRZV01002640.1	AJAPscaffold2754
MRZV01002641.1	AJAPscaffold2755
MRZV01002642.1	AJAPscaffold2756
MRZV01002643.1	AJAPscaffold2757
MRZV01002644.1	AJAPscaffold2758
MRZV01002645.1	AJAPscaffold2759
MRZV01000275.1	AJAPscaffold276
MRZV01002646.1	AJAPscaffold2760
MRZV01002647.1	AJAPscaffold2761
MRZV01002648.1	AJAPscaffold2762
MRZV01002649.1	AJAPscaffold2763
MRZV01002650.1	AJAPscaffold2764
MRZV01002651.1	AJAPscaffold2765
MRZV01002652.1	AJAPscaffold2766
MRZV01002653.1	AJAPscaffold2767
MRZV01002654.1	AJAPscaffold2768
MRZV01002655.1	AJAPscaffold2769
MRZV01000276.1	AJAPscaffold277
MRZV01002656.1	AJAPscaffold2770
MRZV01002657.1	AJAPscaffold2771
MRZV01002658.1	AJAPscaffold2772
MRZV01002659.1	AJAPscaffold2773
MRZV01002660.1	AJAPscaffold2774
MRZV01002661.1	AJAPscaffold2775
MRZV01002662.1	AJAPscaffold2776
MRZV01002663.1	AJAPscaffold2777
MRZV01002664.1	AJAPscaffold2778
MRZV01002665.1	AJAPscaffold2779
MRZV01000277.1	AJAPscaffold278
MRZV01002666.1	AJAPscaffold2780
MRZV01002667.1	AJAPscaffold2781
MRZV01002668.1	AJAPscaffold2782
MRZV01002669.1	AJAPscaffold2783
MRZV01002670.1	AJAPscaffold2784
MRZV01002671.1	AJAPscaffold2785
MRZV01002672.1	AJAPscaffold2786
MRZV01002673.1	AJAPscaffold2787
MRZV01002674.1	AJAPscaffold2788
MRZV01002675.1	AJAPscaffold2789
MRZV01000278.1	AJAPscaffold279
MRZV01002676.1	AJAPscaffold2790
MRZV01002677.1	AJAPscaffold2791
MRZV01002678.1	AJAPscaffold2792
MRZV01002679.1	AJAPscaffold2793
MRZV01002680.1	AJAPscaffold2794
MRZV01002681.1	AJAPscaffold2795
MRZV01002682.1	AJAPscaffold2796
MRZV01002683.1	AJAPscaffold2797
MRZV01002684.1	AJAPscaffold2798
MRZV01000028.1	AJAPscaffold28
MRZV01000279.1	AJAPscaffold280
MRZV01002685.1	AJAPscaffold2800
MRZV01002686.1	AJAPscaffold2801
MRZV01002687.1	AJAPscaffold2802
MRZV01002688.1	AJAPscaffold2803
MRZV01002689.1	AJAPscaffold2804
MRZV01002690.1	AJAPscaffold2805
MRZV01002691.1	AJAPscaffold2806
MRZV01002692.1	AJAPscaffold2807
MRZV01002693.1	AJAPscaffold2808
MRZV01002694.1	AJAPscaffold2809
MRZV01000280.1	AJAPscaffold281
MRZV01002695.1	AJAPscaffold2810
MRZV01002696.1	AJAPscaffold2811
MRZV01002697.1	AJAPscaffold2812
MRZV01002698.1	AJAPscaffold2813
MRZV01002699.1	AJAPscaffold2814
MRZV01002700.1	AJAPscaffold2815
MRZV01002701.1	AJAPscaffold2816
MRZV01002702.1	AJAPscaffold2817
MRZV01002703.1	AJAPscaffold2818
MRZV01002704.1	AJAPscaffold2819
MRZV01000281.1	AJAPscaffold282
MRZV01002705.1	AJAPscaffold2820
MRZV01002706.1	AJAPscaffold2821
MRZV01002707.1	AJAPscaffold2823
MRZV01002708.1	AJAPscaffold2824
MRZV01002709.1	AJAPscaffold2825
MRZV01002710.1	AJAPscaffold2826
MRZV01002711.1	AJAPscaffold2827
MRZV01002712.1	AJAPscaffold2828
MRZV01002713.1	AJAPscaffold2829
MRZV01000282.1	AJAPscaffold283
MRZV01002714.1	AJAPscaffold2830
MRZV01002715.1	AJAPscaffold2831
MRZV01002716.1	AJAPscaffold2832
MRZV01002717.1	AJAPscaffold2833
MRZV01002718.1	AJAPscaffold2834
MRZV01002719.1	AJAPscaffold2835
MRZV01002720.1	AJAPscaffold2836
MRZV01002721.1	AJAPscaffold2837
MRZV01002722.1	AJAPscaffold2838
MRZV01002723.1	AJAPscaffold2839
MRZV01000283.1	AJAPscaffold284
MRZV01002724.1	AJAPscaffold2840
MRZV01002725.1	AJAPscaffold2841
MRZV01002726.1	AJAPscaffold2842
MRZV01002727.1	AJAPscaffold2843
MRZV01002728.1	AJAPscaffold2844
MRZV01002729.1	AJAPscaffold2845
MRZV01002730.1	AJAPscaffold2846
MRZV01002731.1	AJAPscaffold2847
MRZV01002732.1	AJAPscaffold2848
MRZV01002733.1	AJAPscaffold2849
MRZV01000284.1	AJAPscaffold285
MRZV01002734.1	AJAPscaffold2850
MRZV01002735.1	AJAPscaffold2851
MRZV01002736.1	AJAPscaffold2852
MRZV01002737.1	AJAPscaffold2853
MRZV01002738.1	AJAPscaffold2854
MRZV01002739.1	AJAPscaffold2855
MRZV01002740.1	AJAPscaffold2856
MRZV01002741.1	AJAPscaffold2857
MRZV01002742.1	AJAPscaffold2858
MRZV01002743.1	AJAPscaffold2859
MRZV01000285.1	AJAPscaffold286
MRZV01002744.1	AJAPscaffold2860
MRZV01002745.1	AJAPscaffold2861
MRZV01002746.1	AJAPscaffold2862
MRZV01002747.1	AJAPscaffold2863
MRZV01002748.1	AJAPscaffold2864
MRZV01002749.1	AJAPscaffold2865
MRZV01002750.1	AJAPscaffold2866
MRZV01002751.1	AJAPscaffold2867
MRZV01002752.1	AJAPscaffold2868
MRZV01002753.1	AJAPscaffold2869
MRZV01000286.1	AJAPscaffold287
MRZV01002754.1	AJAPscaffold2870
MRZV01002755.1	AJAPscaffold2871
MRZV01002756.1	AJAPscaffold2872
MRZV01002757.1	AJAPscaffold2873
MRZV01002758.1	AJAPscaffold2874
MRZV01002759.1	AJAPscaffold2875
MRZV01002760.1	AJAPscaffold2876
MRZV01002761.1	AJAPscaffold2877
MRZV01002762.1	AJAPscaffold2878
MRZV01002763.1	AJAPscaffold2879
MRZV01000287.1	AJAPscaffold288
MRZV01002764.1	AJAPscaffold2880
MRZV01002765.1	AJAPscaffold2881
MRZV01002766.1	AJAPscaffold2882
MRZV01002767.1	AJAPscaffold2883
MRZV01002768.1	AJAPscaffold2884
MRZV01002769.1	AJAPscaffold2885
MRZV01002770.1	AJAPscaffold2886
MRZV01002771.1	AJAPscaffold2887
MRZV01002772.1	AJAPscaffold2888
MRZV01002773.1	AJAPscaffold2889
MRZV01000288.1	AJAPscaffold289
MRZV01002774.1	AJAPscaffold2890
MRZV01002775.1	AJAPscaffold2891
MRZV01002776.1	AJAPscaffold2892
MRZV01002777.1	AJAPscaffold2893
MRZV01002778.1	AJAPscaffold2894
MRZV01002779.1	AJAPscaffold2895
MRZV01002780.1	AJAPscaffold2896
MRZV01002781.1	AJAPscaffold2897
MRZV01002782.1	AJAPscaffold2898
MRZV01002783.1	AJAPscaffold2899
MRZV01000029.1	AJAPscaffold29
MRZV01000289.1	AJAPscaffold290
[truncated: 1,278 more rows]
